# Supplementary material
Source: PubMed Central journal article supplement (PMC11071767)

A

## EDC over VEH

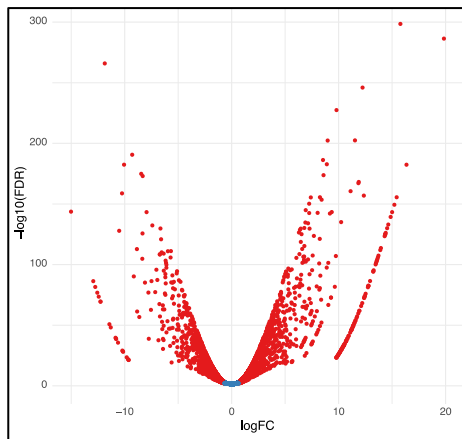

1487 up, 1455 down

B

|                        | Gene     | EDC_over_VEH |
|------------------------|----------|--------------|
| TGF- $\beta$ signaling | Thbs2    | 12.24        |
|                        | Inhbb    | 7.91         |
|                        | Tgfb1    | 3.54         |
|                        | Thbs1    | 2.34         |
|                        | Gdf6     | 2.31         |
|                        | Serpine1 | 1.61         |
|                        | Pmepa1   | 1.48         |
|                        | Ltbp2    | 1.16         |
|                        | Ltbp1    | 1.12         |
|                        | Inhba    | 1.12         |
|                        | Junb     | 1.11         |
|                        | Inha     | -1.29        |
|                        | Ltbp3    | -1.49        |
|                        | Ltbp4    | -4.61        |

$\text{Log}_2 \text{FC}$

C

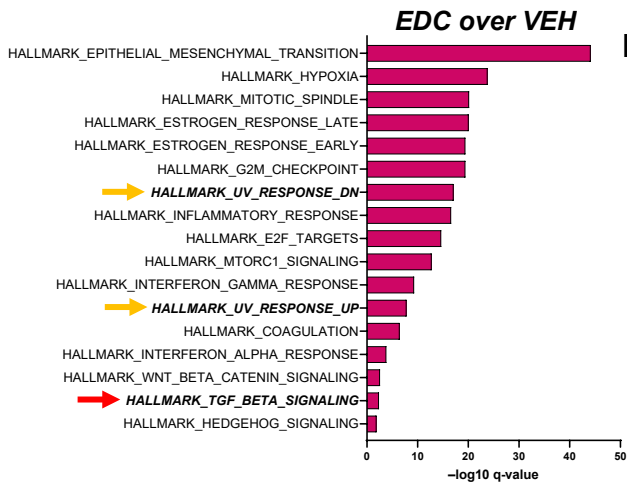

D

|               | Gene   | EDC_over_VEH |
|---------------|--------|--------------|
| NER signaling | Pole   | 1.17         |
|               | Polr2e | -1.01        |
|               | Xpc    | -1.05        |
|               | Xpa    | -1.25        |
|               | Pola2  | -1.97        |
|               | Top2a  | -2.32        |

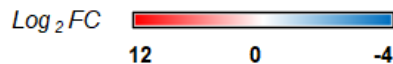

Supplement: 18_2023_4928_MOESM1_ESM.pdf [file 18_2023_4928_MOESM1_ESM.pdf]
