# Supplementary material
Source: PubMed Central journal article supplement (PMC11071767)

**A*****VEH+TGFβ1 over VEH***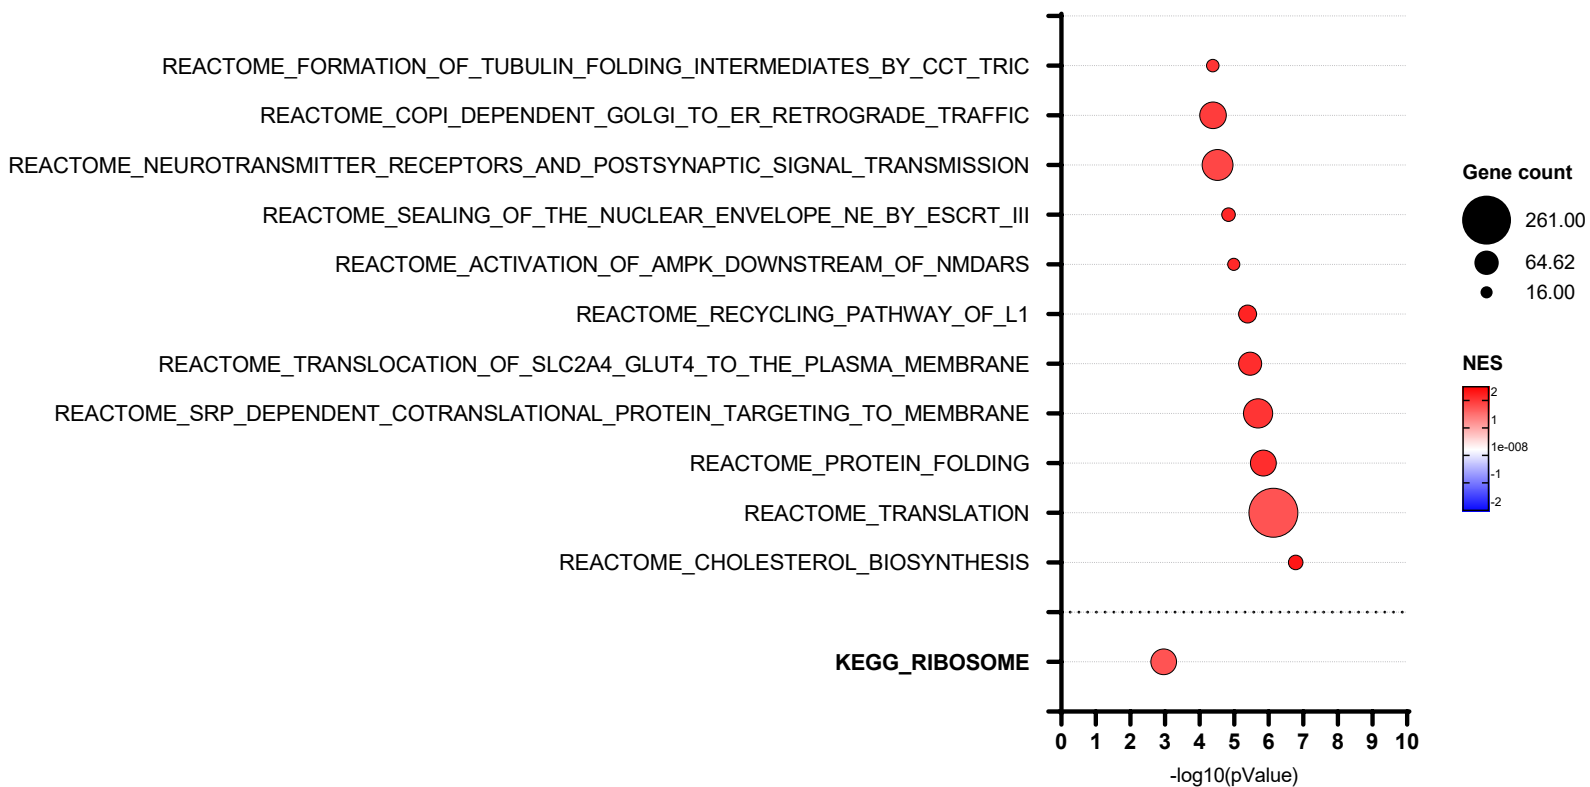**B*****EDC+TGFβ RI inhibitor over EDC***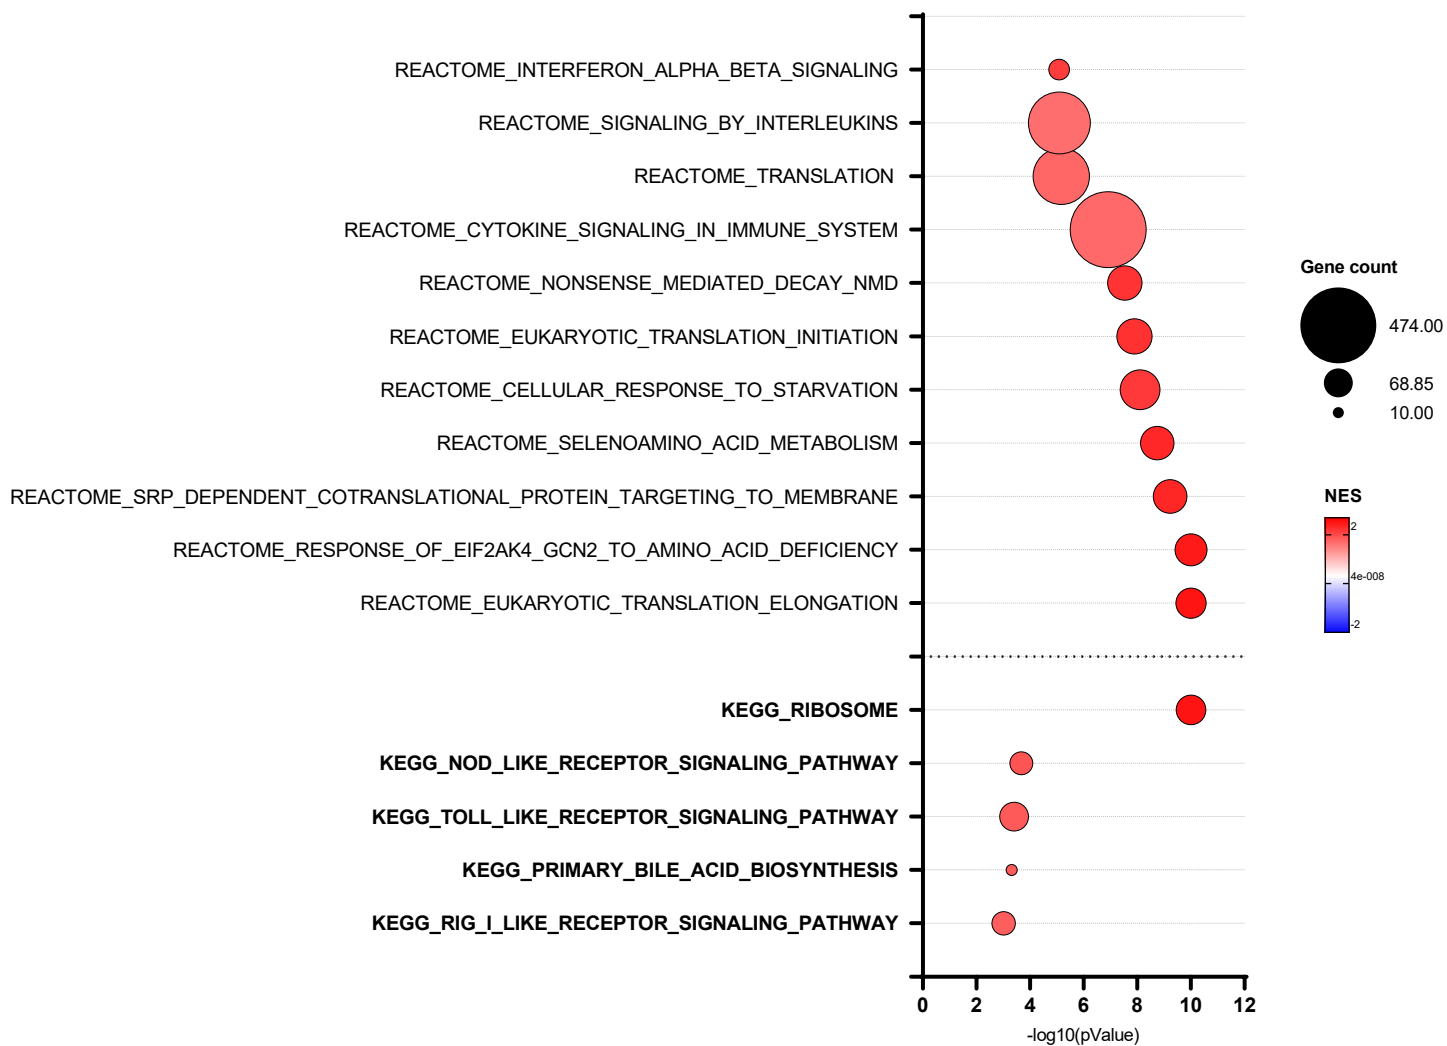

Supplement: 18_2023_4928_MOESM2_ESM.pdf [file 18_2023_4928_MOESM2_ESM.pdf]
